# Supplementary material for: The Differential Response of Proteins to Macromolecular Crowding
Source: PLoS Comput Biol. 2016 Jul 29;12(7):e1005040. doi: 10.1371/journal.pcbi.1005040 (PMC4966950; doi:10.1371/journal.pcbi.1005040)
Supplement: S1 Table — (ODT) [file pcbi.1005040.s012.odt]

Systems
Density (g/L)
Proteins inside the simulated box
Nº of simulations
Simulated time (per simulation)
Protein Crowding
175
1 ACTR : 6 NCBD (3 folded, 3 unfolded) : 1 IRF-3
1
> 3 micro
192
1 ACTR : 6 NCBD (3 folded, 3 unfolded) : 1 IRF-3
1
> 3 micro
239
1 ACTR : 6 NCBD (3 folded, 3 unfolded) : 1 IRF-3
1
> 3 micro
273
1 ACTR : 6 NCBD (3 folded, 3 unfolded) : 1 IRF-3
1
> 3 micro
296
1 ACTR : 6 NCBD (3 folded, 3 unfolded) : 1 IRF-3
1
> 3 micro


PEG500
200
Each protein alone
8
> 3 micro


Water
--
Each protein alone
8
> 3 micro


Protein Crowding  4X
183
4 ACTR : 24 NCBD (12 folded, 12 unfolded) : 4 IRF-3
1
100 ns


Binding partners in water
--
1 ACTR : 1 NCBD folded
10
10 ns 
--
1 ACTR : 1 NCBD unfolded
10
10 ns
--
1 IRF-3 : 1 NCBD folded
10
10 ns
--
1 IRF-3: 1 NCBD unfolded
10
10 ns
